# Supplementary material
Source: MDPI journal article supplement (https://www.mdpi.com/1424-8220/15/2/4550)
Supplement: s1 [file s1]

## Supplementary Information

# Real-Time Strap Pressure Sensor System for Powered Exoskeletons. *Sensors* 2015, 15, 4550–4563

Jesús Tamez-Duque <sup>1</sup>, Rebeca Cobian-Ugalde <sup>1</sup>, Atilla Kilicarslan <sup>2</sup>, Anusha Venkatakrishnan <sup>2</sup>, Rogelio Soto <sup>1</sup> and Jose Luis Contreras-Vidal <sup>2,\*</sup>

<sup>1</sup> National Robotics Laboratory, School of Engineering and Sciences, Tecnológico de Monterrey, Monterrey N.L. 64849, Mexico; E-Mails: chuy\_611@hotmail.com (J.T.-D.); cobian.rivka@gmail.com (R.C.-U.); rsoto@itesm.mx (R.S.)

<sup>2</sup> Laboratory for Non-Invasive Brain-Machine Interface Systems, Department of Electrical and Computer Engineering, University of Houston, Houston, TX 77004, USA; E-Mails: a.kilicarslan@gmail.com (A.K.); anushavenkat1@gmail.com (A.V.)

\* Author to whom correspondence should be addressed; E-Mails: jlcontreras-vidal@uh.edu; Tel.: +1-713-743-4429.

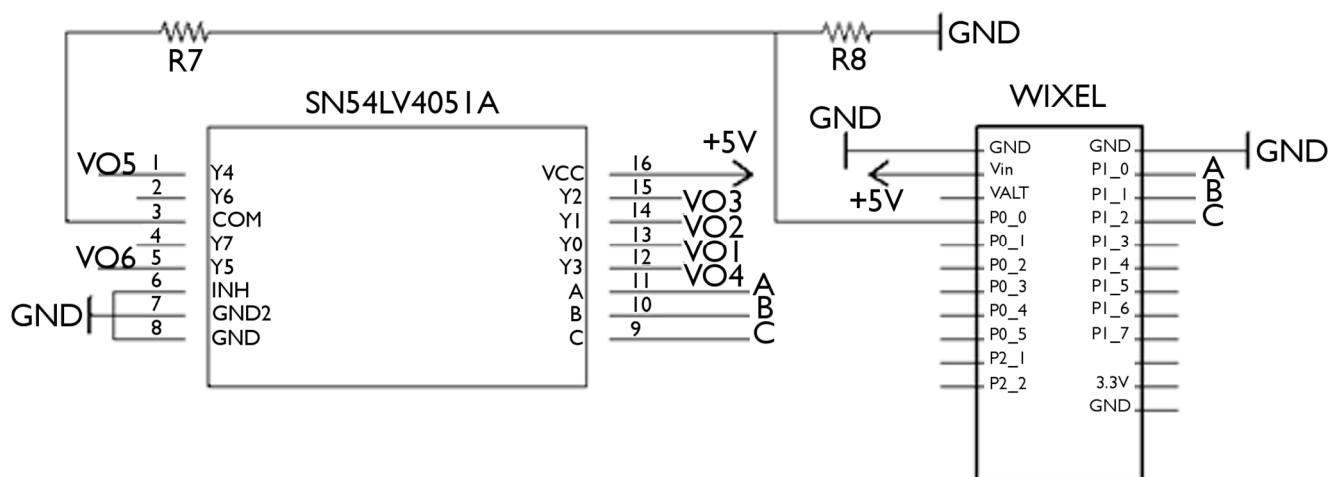

**Figure S1.** Multiplexor with sensor inputs VO1-VO6. Wixel module is included for wireless transmission of data.

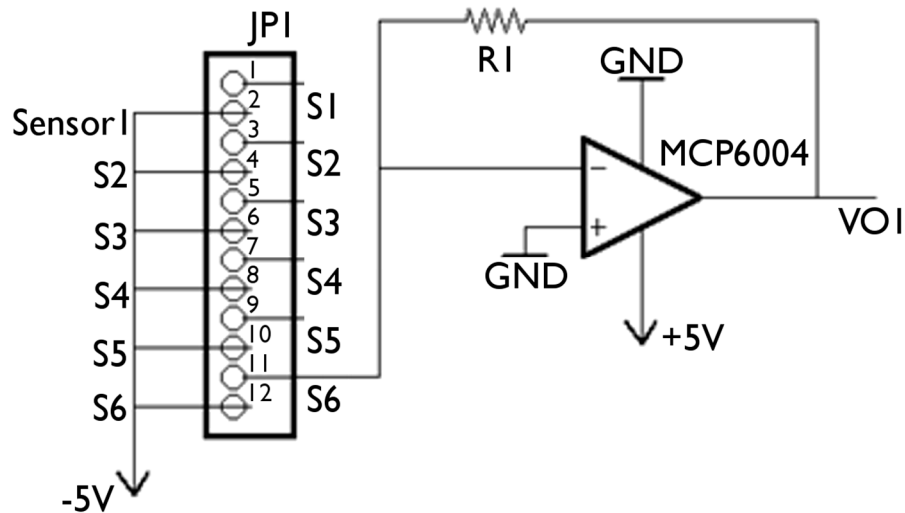

**Figure S2.** Electronic configuration used for each sensor.

Bending effect on pressure measurements.

68.37 mm Hg reference.

|                                                                                     |               |             |          |
|-------------------------------------------------------------------------------------|---------------|-------------|----------|
|    | $r = 9.79$ cm | 73.05 mm Hg | 106.85 % |
|  | $r = 7.99$    | 78.04       | 114.14 % |
|  | $r = 6.03$    | 79.42       | 116.16 % |
|  | $r = 3.64$    | 85.29       | 124.76 % |

**Figure S3.** Measurement variations with respect to sensor bending.

**Table S1.** Component details for the developed circuit shown in Figures 6 and 7.

| Name on Schematic | Component                                   |
|-------------------|---------------------------------------------|
| S1–S6             | Tekscan's FlexiForce® A401-25 Force Sensors |
| SN54LV4051A       | CMOS Analog Multiplexer                     |
| WIXEL             | Polulu Wixel®                               |
| MCP6004           | Op-amp                                      |
| R1–R6             | 20k Resistor (1% tolerance)                 |
| R8                | 2.2k Resistor (1% tolerance)                |
| R7                | 1.8k Resistor (5% tolerance)                |
